# Supplementary material for: Statins for the Primary Prevention of Coronary Heart Disease
Source: Biomed Res Int. 2019 Jan 29;2019:4870350. doi: 10.1155/2019/4870350 (PMC6374814; doi:10.1155/2019/4870350)
Supplement: Supplementary Materials — There were three supplementary materials. The first one is the “PRISMA checklist”, the second one is “The detailed search strategy of included studies”, and the third one is Supplement Figure 1-5: Supplement Figure 1: the occurrence of angina (subgroup analysis). Supplement Figure 2: the occurrence of nonfatal myocardial infarction (subgroup analysis). Supplement Figure 3: the occurrence of any myocardial infarction (subgroup analysis). Supplement Figure 4: the occurrence of any coronary heart events (subgroup analysis). Supplement Figure 5: the occurrence of all-cause mortality (subgroup analysis). [file 4870350.f1.zip]

Archive with 2 entries (2 files):
- Supplementary materials_BMRI_2620168.doc
- Supplementary materials_BMRI_2620169.pdf
